1 **Industrial bees: when agricultural intensification doesn't impact**  
2 **local disease prevalence.**

3 Lewis J. Bartlett<sup>1\*</sup>, Carly Rozins<sup>1,2\*</sup>, Berry J. Brosi<sup>3</sup>, Keith S. Delaplane<sup>4</sup>, Jacobus C. de Roode<sup>5</sup>,  
4 Andrew White<sup>6</sup>, Lena Wilfert<sup>1</sup>, Michael Boots<sup>1,2,†</sup>

5 1 Centre for Ecology and Conservation, University of Exeter, TR10 9FE, UK

6 2 Department of Integrative Biology, University of California, Berkeley, CA, 94720, USA

7 3 Department of Environmental Sciences, Emory University, Atlanta, GA, 30322, USA

8 4 Department of Entomology, University of Georgia, Athens, GA, 30602, USA

9 5 Department of Biology, Emory University, Atlanta, GA, 30322, USA

10 6 Department of Mathematics, Heriot-Watt University, Edinburgh EH14 4AS, UK

11 \* These authors contributed equally to this work.

12 † [mboots@berkeley.edu](mailto:mboots@berkeley.edu)

13

## 14 **Summary**

15 **1)** Although it is generally thought that the intensification of farming will result in higher  
16 disease prevalences there is little specific modelling testing this idea. We build multi-colony  
17 models to inform how ‘apicultural intensification’ is predicted to impact honeybee pathogen  
18 epidemiology at the apiary scale.

19 **2)** Counter to the prevailing view, our models predict that intensification, captured though  
20 increased population sizes, changes in population network structure, and increased  
21 between-colony transmission, is likely to have little effect on disease prevalence within an  
22 apiary.

23 **3)** The greatest impacts of intensification are found for diseases with relatively low  $R_0$  (basic  
24 reproduction number), however, such diseases cause little overall disease prevalence and  
25 therefore the impacts of intensification are minor. Furthermore, the smallest impacts of  
26 intensification are found for diseases with high  $R_0$  values, which we argue are typical of  
27 important honeybee diseases.

28 **4) Policy Implications:** Our findings highlight a lack of support for the hypothesis that current  
29 and ongoing intensification leads to notably higher disease prevalences. More broadly, our  
30 work demonstrates the need for informative models of agricultural systems and  
31 management practices in order to understand the implications of management changes on  
32 diseases.

33

34 **Key Words:** apiculture, intensification, infectious disease, mathematical model

## 35 Introduction

36 Infectious diseases exact tolls on agricultural sustainability (Brijnath, Butler, & McMichael, 2014) and  
37 profitability (James, 1981). A key question is how agricultural intensification and novel agricultural  
38 practices impact the emergence and epidemiology of infectious disease (Cressler, McLeod, Rozins,  
39 Hoogen, & Day, 2016; Gandon, Hochberg, Holt, & Day, 2013). A general assumption is that  
40 intensification increases vulnerability to severe disease outbreaks (Jones et al., 2013; Kennedy et al.,  
41 2016; Mennerat, Nilsen, Ebert, & Skorpung, 2010), but there is relatively little empirical data we can  
42 use to understand how different agricultural approaches influence infectious disease prevalences,  
43 epidemiological theory is therefore a useful alternative (Atkins et al., 2013; Rozins & Day, 2016).  
44 Here we build specific models of apiary-level intensification in commercially farmed honeybees to  
45 examine the impact of industrial-scale management practices on honeybee infectious disease  
46 prevalence.

47 Honeybee health and the apicultural industry are under threat from a variety of pressures (Ghazoul,  
48 2005; vanEngelsdorp & Meixner, 2010), including parasites and pathogens (Budge et al., 2015; De la  
49 Rúa, Jaffé, Dall'Olio, Muñoz, & Serrano, 2009; Potts et al., 2010). There is a growing body of  
50 literature documenting the damage that emerging or re-emerging diseases (Wilfert et al., 2016) are  
51 causing in apiculture (Jacques et al., 2017; Kielmanowicz et al., 2015) and native pollinators (Cohen,  
52 Quistberg, Philpott, & DeGrandi-Hoffman, 2017; Fürst, McMahon, Osborne, Paxton, & Brown, 2014;  
53 Graystock, Blane, McFrederick, Goulson, & Hughes, 2016; Manley, Boots, & Wilfert, 2015; McMahon  
54 et al., 2015; McMahon, Wilfert, Paxton, & Brown, 2018). Evidence exists supporting a link between  
55 the risk of these diseases and specific apicultural practices (Giacobino et al., 2014; Mötus, Raie, Orro,  
56 Chauzat, & Viltrop, 2016; Pacini et al., 2016). However, the evidence is geographically limited,  
57 lacking in mechanistic underpinning, or contradictory even within this small collection of studies. It is  
58 therefore critical that we learn how different apicultural practices impact disease outcomes (Brosi,  
59 Delaplane, Boots, & Roode, 2017). The need for an epidemiological framing of honeybee diseases

60 has been frequently discussed (Brosi et al., 2017; Fries & Camazine, 2001) in both empirical (van  
61 Engelsdorp et al., 2013) and modelling (Becher, Osborne, Thorbek, Kennedy, & Grimm, 2013)  
62 studies, but we lack a modelling framework for disease ecology in honeybees at a scale larger than a  
63 single colony.

64 Honeybees are typically managed in apiaries, which are associated colonies placed together for  
65 beekeeping convenience at a single site. Pathogen dynamics at the apiary level are determined both  
66 by pathogen transmission within and between colonies. Intensification of apiculture changes apiary  
67 ecology in a number of ways, all potentially relevant to disease (Brosi et al., 2017). In particular,  
68 increasing the number of colonies and changing the arrangement of those colonies influences  
69 epidemiology through changes in both the size and network structure of the population. They both  
70 may also increase the rate at which transmission between colonies occurs via more frequent  
71 'drifting' of honeybees (Free, 1958; Neumann, Radloff, Pirk, & Hepburn, 2003). Drift is a key  
72 mechanism of between-colony pathogen transmission (Goodwin, Perry, & Houten, 1994; Roetschi,  
73 Berthoud, Kuhn, & Imdorf, 2008) and has been invoked as an explanatory mechanism accounting for  
74 higher disease prevalences in larger apiaries (Mötus et al., 2016).

75 The intensification of agricultural systems generally means larger, denser population sizes and  
76 greater pathogen transmissibility at the local and landscape scale. To understand these effects in  
77 honeybees we build multi-colony models to examine how apicultural intensification is predicted to  
78 impact honeybee pathogen epidemiology. We examine the epidemiological consequences of  
79 increasing the number of colonies within an apiary, changing colony configurations, and increasing  
80 between-colony pathogen transmission.

## 81 **Methods**

82 We combine mathematical models and agent-based model (ABM) simulations to make predictions  
83 on how intensification affects disease risk, spread, and endemic prevalence within an apiary. The key  
84 to our approach is that we capture pathogen transmission both within and between colonies.

85 We generalise colony arrangements to three unique configurations: array, circular and lattice (Fig.  
86 1). We restrict between-colony pathogen transmission to nearest neighbours (see discussion), those  
87 in closest proximity to each other (connected by an arrow in Fig. 2). Between-colony transmission is  
88 always assumed to be at a lower rate than within colony transmission. The mathematical model  
89 allows us to obtain tractable analytical results while the ABM simulations allow us to model disease  
90 at the level of the individual bee and consider stochastic effects.

91

92

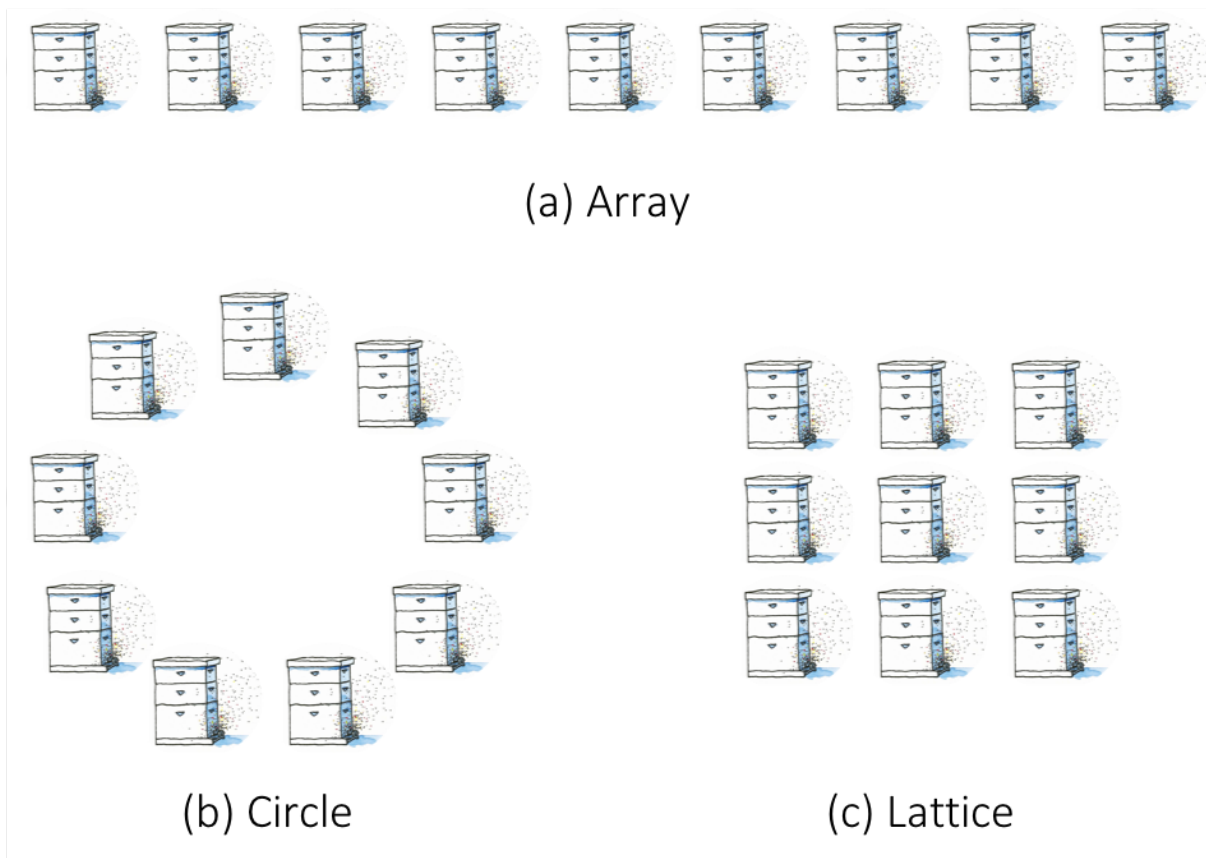

93

94 **Figure 1.** Colony configurations, demonstrated for apiaries with nine colonies.

95 We first derive a compartmental SI (Susceptible, Infected) model for pathogen transmission within  
96 an apiary. The model treats each colony as an individual population and allows for within colony as  
97 well as between-colony transmission (for nearest neighbours). Within a colony, honeybees are  
98 either susceptible to infection or infected (and infectious). We denote the number of susceptible  
99 honeybees in colony  $i$  at time  $t$  as  $S_i(t)$ . Likewise, we denote the number of honeybees in colony  $i$   
100 infected with the pathogen at time  $t$  as  $I_i(t)$ . Susceptible honeybees in colony  $i$  become infected at  
101 rate  $\beta_{ij}$  following contact with an infected bee that resides in colony  $j$ . We assume that honeybees do  
102 not recover from infection. Honeybees are born at rate  $\phi$ , have a natural mortality rate of  $m$ , and an  
103 additional mortality rate of  $v$  if infected. The following  $2n$  differential equations, [1], model disease  
104 transmission within and between  $n$  colonies in an apiary.

$$\begin{aligned}\frac{dS_i}{dt} &= - \sum_{j=1}^n \beta_{ij} S_i I_j - m S_i + \phi \\ \frac{dI_i}{dt} &= \sum_{j=1}^n \beta_{ij} S_i I_j - (m + v) I_i\end{aligned}\quad [1]$$

105 The matrix  $\beta=[\beta_{ij}]$  will depend on the colony arrangement (see Fig. 1; and S.I. Section 1). The  
106 transmission rate between a susceptible and infected honeybee within the colony is  $a$ , and  
107 transmission between neighbouring colonies is  $b$ . We assume that honeybees are much more likely  
108 to become infected by a honeybee that resides within its home colony than by a honeybee from a  
109 neighbouring colony (i.e.  $a \gg b$ ). Note that for each apiary configuration to be possible and unique,  
110 the number of colonies ( $n$ ) must be a perfect square,  $n=L^2$  where  $L \geq 3$  (see Fig. 1). Therefore, the  
111 minimum number of colonies per apiary is 9, which has been observed to be the mean size of a  
112 hobbyist or small beekeeping operation (Mötus et al., 2016; Pocol, Marghitas, & Popa, 2012).

113 We complement our mathematical model [1] with the ABM; our ABMs are simulations of pathogen  
114 spread, through individual bee movements, across an apiary. Apiaries are differentiated by the same  
115 characteristics as in the mathematical model; a description of the ABM is available in the S.I. (Section  
116 2). We use the ABM to make standalone predictions on the effects of different aspects of  
117 intensification on pathogen epidemiology (S.I. Figs. S3 & S4). We use the ABM to simulate disease  
118 dynamics for both different pathogen phenotypes (varying both pathogen virulence and  
119 transmissibility) and different apiary ecologies (varied as previously described in the number of  
120 colonies per apiary, layout, and likelihood of bees moving between colonies).

121 We can understand the dynamics presented by our models by focussing on the basic reproduction  
122 number,  $R_0$ .  $R_0$  is a fundamental concept in infectious disease ecology, defined as the average  
123 number of secondary infections caused by one infectious individual in an otherwise entirely  
124 susceptible population (Anderson, May, & Anderson, 1992). We derive  $R_0$  expressions, using model  
125 [1], for each of the apiary configurations.  $R_0$  derivations using model [1] allow us to characterise the  
126 relationship between  $R_0$  and pathogen prevalence, defined as the proportion of honeybees within an  
127 apiary that are infected at the endemic equilibrium. For the ABM we calculate  $R_0$  values for  
128 particular parameter combinations by treating simulation outputs as ideal empirical data (Keeling &  
129 Rohani, 2008) and track the number of infections following the index case. The term 'base  $R_0$ ' is used  
130 throughout the remainder of this paper and refers to a value of  $R_0$  for a specific pathogen phenotype  
131 in a least intensified apiary (see Fig. 2). We determine how intensification affects  $R_0$  by separating  $R_0$   
132 into a 'base  $R_0$ ' and an 'additional  $R_0$ '. The term 'additional  $R_0$ ' refers to the observed difference in  $R_0$   
133 for a given pathogen phenotype when comparing a 'lower intensity' apiary to a 'high intensity' one  
134 (Fig. 2)

135 The most extreme plausible examples of intensification are used in these comparisons. Specifically,  
136 these are increases in colonies per apiary from 9 to 225 colonies, a change to a lattice configuration,  
137 and/or a tenfold increase in honeybee movement likelihood between colonies to 0.15 per bee per

138 day, demonstrated in Fig. 2. Each is examined individually but we focus on the combined effect  
139 (reflected in Fig. 2). The difference in the  $R_0$  before and after intensification is how we calculate  
140 ‘additional  $R_0$ ’. This permits the interaction (non-additive) effects of our three aspects of  
141 intensification. The ‘additional  $R_0$ ’ can then be used in combination with the analytically derived  
142 relationship between  $R_0$  and prevalence (see model [1] & Results) to characterise how intensification  
143 affects disease prevalence. We focus on disease prevalence as both models show rapid pathogen  
144 spread across apiaries, such that infection prevalence at the endemic equilibrium was the major  
145 result differentiating modelling scenarios (S.I. Figs. S4 & S5).

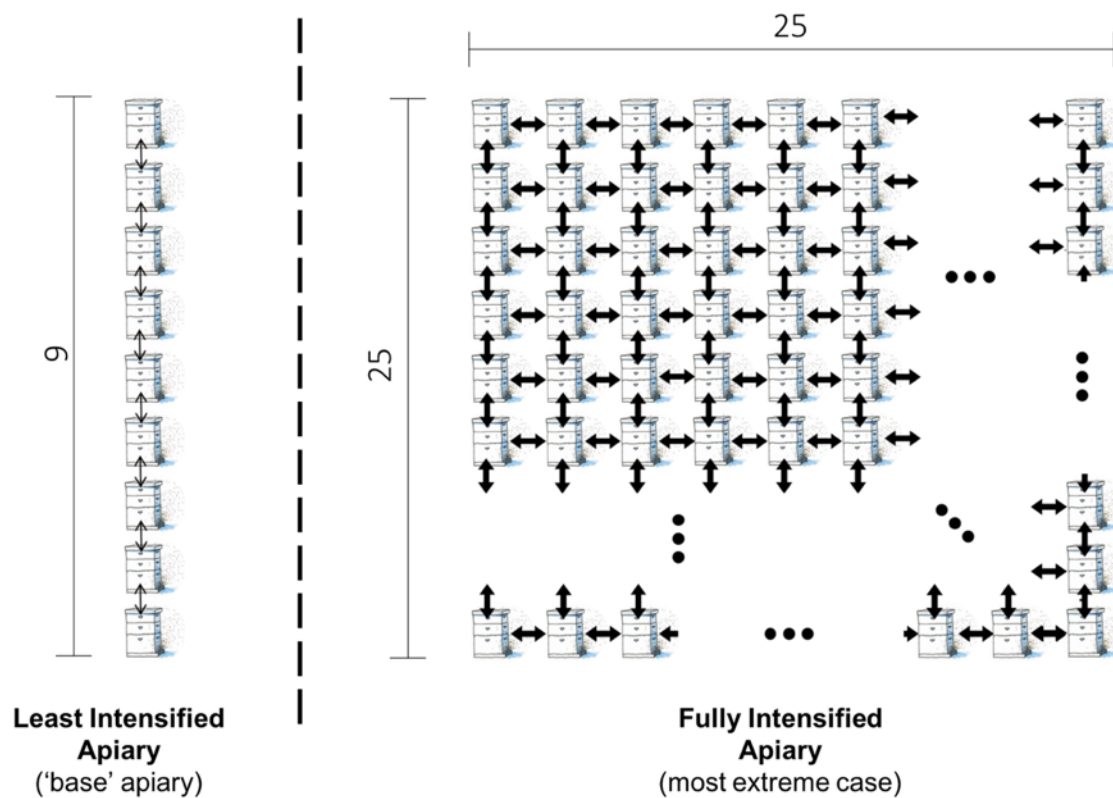

146 **Figure 2.** Illustrative schematic of ‘intensification’ as it is used in parts of this manuscript. We show the apiary  
147 used to calculate ‘base  $R_0$ ’ (left) compared to the intensified apiary (right) reflecting an increase in number of  
148 colonies from 9 to 225, a change from an array to a lattice, and a tenfold increase in movement of honeybees  
149 between colonies (illustrated using arrow weight) from a likelihood of 0.015 per bee per day to 0.15. Note that  
150 for the intensified apiary, not all 225 colonies are shown, with missing colonies denoted by ellipses (...).

151

## 152 Results



153 The  $R_0$  expressions for apiaries with  $n>1$  colonies was calculated using the next generation method  
 154 (van den Driessche & Watmough, 2002), (see S.I. Section 1).

$$R_{0Array} = \frac{\phi}{m(m+v)} \left( a - 2b \cos \frac{n\pi}{n+1} \right) \quad [2a]$$

$$R_{0Circle} = \frac{\phi}{m(m+v)} (a + 2b) \quad [2b]$$

$$R_{0Lattice} = \frac{\phi}{m(m+v)} \left( a - 4b \cos \frac{\sqrt{n}\pi}{\sqrt{n}+1} \right) \quad [2c]$$

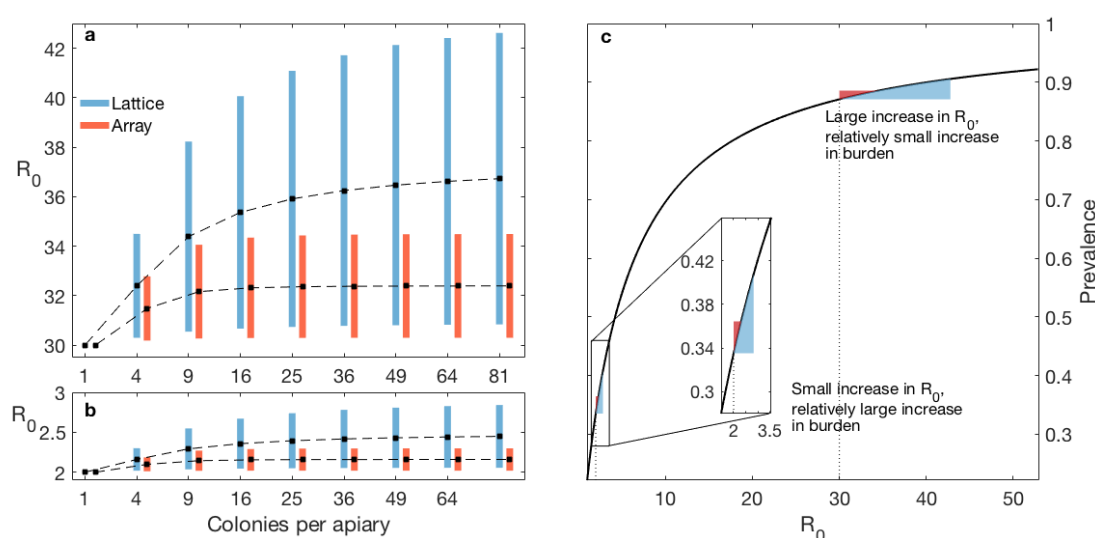

155  
 156 **Figure 3:** Relationships between number of colonies,  $R_0$ , and prevalence. **a)** When  $R_0=30$  for a single colony-  
 157 apiary, the addition of colonies yields a maximum increase in  $R_0$  of 12.7 for the lattice and 4.5 for the array. **b)**  
 158 When  $R_0=2$  for a single colony, there is a maximum increase in  $R_0$  of 0.85 for the lattice and 0.29 for the array,  
 159 when colonies are added. Recall that the  $R_0$  for the circle is independent of  $n$  (see [2b]), and hence absent from  
 160 the figure. Black dots are values where between-colony transmission is held at 10% of total transmission, with  
 161 the bottom and top of the bars representing 1% and 20% of the total transmission respectively. **c)** The  
 162 relationship between  $R_0$  and disease prevalence. The range of  $R_0$  values is generated by varying the overall  
 163 transmission rate (i.e.  $a+b$ ) from  $2.143 \times 10^{-6}$  to  $1.178 \times 10^{-4}$  as reported by Roberts & Hughes (2015) for *Nosema*  
 164 *ceranae*.

165  
 166 Both model [1] and the ABM simulations show that, for a given number of colonies per apiary,  $R_0$  is  
 167 always greatest for the lattice arrangement — the most highly connected configuration. As the  
 168 number of colonies per apiary increases (increasing  $n$ ), the values of  $R_0$  in both the array and lattice  
 169 configurations increase (Fig. 3a & 3b), while the  $R_0$  for the circular configuration remains unchanged

170 (see  $R_0$  equations). The increase in  $R_0$  from the addition of colonies asymptotes quickly due to  
171 convergence in the mean number of neighbours across the apiary; this is also why the  $R_0$  for the  
172 circular apiary is independent of number of colonies as the number of neighbours per colony  
173 remains two.

174 If  $R_0 > 1$ , the pathogen will rapidly invade (see S.I. Section 1 &, Fig. S5) and each colony will reach a  
175 stable population size and infection prevalence, called the endemic equilibrium (See S.I. Section 1).  
176 Mathematically the disease prevalence at equilibrium for colony  $j$  is  $I_j^*/(I_j^* + S_j^*)$ , where  $S_j^*$  is the  
177 number of susceptible honeybees and  $I_j^*$  is the number of infectious honeybees in colony  $j$  at  
178 equilibrium. The endemic equilibrium for the circular configuration model can be solved explicitly  
179 (see S.I. Section 1). Due to symmetry, all colonies within the circular apiary have disease prevalence  
180 at the endemic equilibrium of:

$$\frac{\phi(a + 2b) - m(m + v)}{\phi(a + 2b) + v(m + v)}$$

181 We can approximate the endemic equilibrium for the lattice and array configured models using  
182 perturbation theory, assuming  $0 < b \ll 1$  (See S.I. Section 1). The approximate disease prevalence  
183 in colony  $j$  at equilibrium for a colony in the array or lattice configurations is:

$$\frac{\phi a^2 + lbm(m + v)}{\phi a^2 + a(m + v)^2 - blv(m + v)}$$

184 where  $l$  is the number of neighbours that colony  $j$  has. For any given set of parameters, we can  
185 therefore formulate both  $R_0$  and prevalence, allowing us to characterise the relationship shown in  
186 Fig. 3c.

187 We show analytically, and in the ABM (S.I. Section 3) that intensification in the form of an increase in  
188 colonies or an increase in movement between colonies increases  $R_0$  (Fig. 3a & 3b). Figure 4 shows  
189 the additional  $R_0$  caused by our most extreme plausible changes in apiary management. The change  
190 in  $R_0$  caused by increasing apiary size rapidly asymptotes (Fig. 3 a & b).

191 Increasing movement between colonies has the strongest effect on  $R_0$  (Fig. 4). However, there are  
192 clear interaction effects present; the combined effect of all three aspects of intensification is greater  
193 than their additive sum. The effect of intensification is dependent on the base  $R_0$  – for small base  $R_0$ ,  
194 intensification causes little additional  $R_0$ , but at intermediate or high base  $R_0$ , intensification leads to  
195 large additional  $R_0$  (Fig. 4). The relationship shows a strong nonlinearity when examining all three  
196 aspects of intensification in combination.

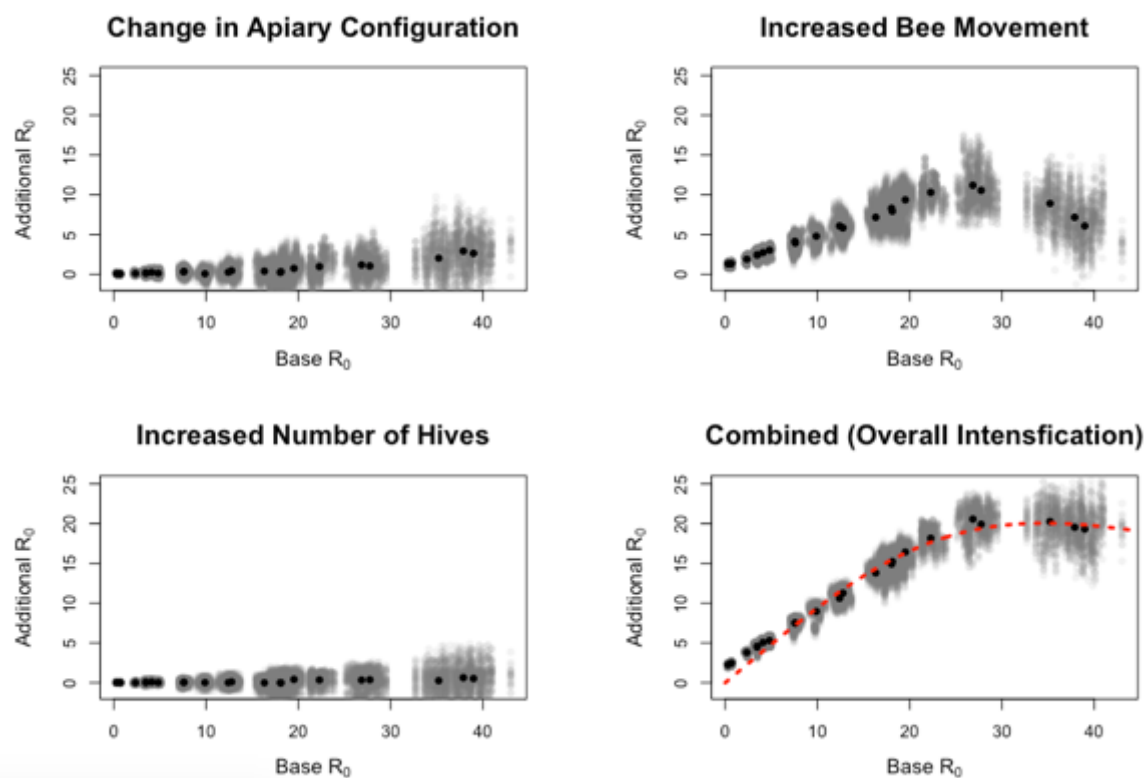

197 **Figure 4:** Simulation results from the ABM. The change in  $R_0$  caused by plausibly extreme increases in colonies  
198 per apiary, bee movement, and a change in configuration, across a range of different 'base  $R_0$ ' values  
199 determined by pathogen phenotype. Grey points represent individual simulation comparisons, black points  
200 represent mean values. Base  $R_0$  values are unevenly distributed across the range due to  $R_0$  being an emergent  
201 property of the system. We derive a non-linear relationship between 'base  $R_0$ ' and 'additional  $R_0$ ' for the  
202 'Combined' treatment (represented in Fig. 2), plotted as a dashed red line.

203

204 By understanding the effect of intensification on  $R_0$  (Fig. 4) and by characterising the relationship  
205 between  $R_0$  and disease prevalence (Fig. 3c), we can show how intensification impacts disease  
206 prevalences. We approximate the non-linear relationship between 'base  $R_0$ ' (pathogen phenotype)  
207 and the 'additional  $R_0$ ' (effect of intensification) for the 'Combined' treatment (Fig. 4). We use a

208 bootstrapping approach to create 1000 subsamples (subsample size = 10% of full sample with  
209 replacement) of our combined approach. Each subsample is used to generate a non-linear model of  
210 the form  $y = ax / (b + x^c)$ , where  $y$  is 'additional  $R_0$ ' and  $x$  is 'base  $R_0$ ', using a nonlinear least squares  
211 approach in R (v 3.3.1). The relationship generated using the full sample is plotted in Fig. 4.

212 We combine this relationship characterising how base  $R_0$  affects intensified additional  $R_0$  (Fig. 4) with  
213 the derived relationship between  $R_0$  and pathogen prevalence shown in Fig. 3c, allowing us to  
214 predict how intensification impacts prevalences (Fig. 5). Fig. 5a shows the proportion of bees  
215 infected by a given (base  $R_0$ ) pathogen for the apiaries in Fig. 2. The difference in disease prevalence  
216 between these lines is the impact of intensification and is plotted in Fig. 5b. Fig. 5b shows a distinctly  
217 non-linear relationship between base  $R_0$  and the impact of intensification, with the impact of  
218 intensification peaking around base  $R_0 = 3.3$ , and then rapidly declining. Even at its peak, the effect  
219 of intensification (which is as extreme as plausible), leads to an additional ~18% of bees infected at  
220 disease equilibrium.

221 We contextualize these results by calculating an estimate of the lower-bound of  $R_0$  value for a  
222 honeybee pathogen (see highlighted regions in Fig. 5). We identified this region based on empirical  
223 data for the microsporidian pathogen *Nosema ceranae*; this was the only pathogen for which  
224 experimentally derived transmission rates as well as robust information on mortality due to infection  
225 is available (Martín-Hernández et al., 2011; Paxton, Klee, Korpela, & Fries, 2007; Roberts & Hughes,  
226 2015). To estimate the plausible  $R_0$  boundary in our model for this pathogen, we parameterised our  
227 mathematical model using the lowest empirically supported transmission value with the highest  
228 supported additional mortality, and fixed movement of honeybees between colonies at its lowest  
229 supported natural rate (Currie & Jay, 1991). We then calculated the  $R_0$  for a circular apiary due to its  
230 scale independence.

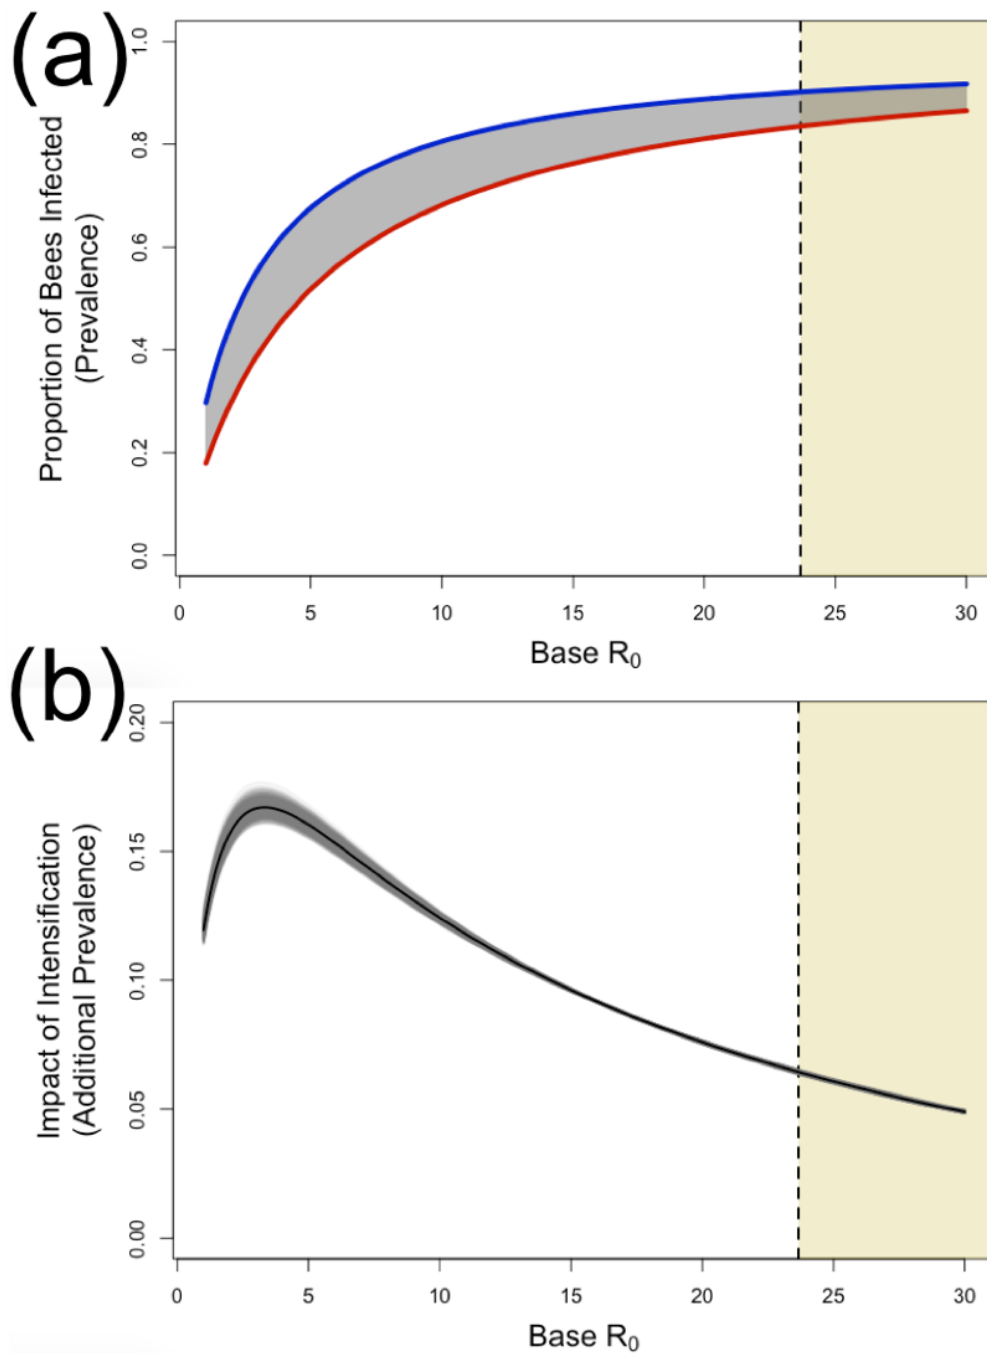

231

232 **Figure 5:** Consequences of intensification on disease prevalence for pathogens with different base  $R_0$  values,  
233 starting at  $R_0 = 1.0008$ . Panel (a) shows the proportion of bees infected (prevalence) in non-intensified apiaries  
234 (lower red line) compared to intensified apiaries (upper blue line), calculated from the mean values derived in  
235 Fig. 4 and the relationship shown in Fig. 3c. The shaded grey area between these curves is the additional  
236 prevalence caused by intensification – the ‘impact of intensification’. This is plotted in panel (b) where the  
237 black line represents the mean relationship, and the grey lines represent 1000 bootstrapped samples. The  
238 vertical dashed line and yellow-shaded region of the graphs to the right of the dashed line show a lowest  
239 estimated value of  $R_0$  for *Nosema ceranae*.

240

## 241 Discussion

242 Our results present a counterintuitive picture of apicultural intensification and its consequences on  
243 disease prevalence within apiaries. Even in their most plausibly extreme cases, changes in the  
244 number of colonies, their spatial arrangement, and the movement of individual bees between  
245 colonies (reflecting intensification (Brosi et al., 2017)) had only a small effect on the severity of  
246 disease at the apiary level. Intensification leads to large gains in  $R_0$  when  $R_0$  is initially high and small  
247 gains in  $R_0$  when  $R_0$  is initially low (Fig. 4). However, increases in  $R_0$  cause large increases in  
248 prevalence only when  $R_0$  is initially low (Fig. 3c). Pathogens with a base  $R_0 \approx 3$  benefit most from  
249 intensification in terms of increased prevalence (Fig. 5); however, the magnitude of this is moderate.  
250 As discussed below, we argue that there is likely to be a high base  $R_0$  in important honeybee diseases  
251 and therefore our models suggest that there is likely to be little effect of apiary-scale intensification  
252 on disease prevalence.

253 Our models most closely resemble the ecology of a directly transmitted microparasite able to infect  
254 individual honeybees at any life stage, conceptually similar to the microsporidian pathogen *Nosema*  
255 spp. (Fantham & Porter, 1912). *Nosema* is a major concern to beekeepers worldwide (Higes et al.,  
256 2008, 2009; Paxton, 2010), and has a minimum estimated base  $R_0$  of 23 (Fig. 5) when modelled here.  
257 We found that apicultural intensification, in the context of a pathogen with an initial  $R_0$  of 23, leads  
258 to a maximum 6.6% increase in disease prevalence. Our models predicted disease prevalences of up  
259 to 90% (Fig. 3, Fig. 5; S.I. Section 3), which while high, are empirically supported for the honeybee  
260 system (Higes et al., 2008; Kielmanowicz et al., 2015), and feature in other modelling studies that  
261 use similar transmission parameters to ours (Matt I. Betti, Wahl, & Zamir, 2014). *Nosema* was the  
262 only pathogen for which there are direct empirical studies characterising its transmissibility,  
263 however, other important honeybee pathogens are well studied, for example strains of deformed  
264 wing virus (DWV-B) (McMahon et al., 2016). While estimating an  $R_0$  for DWV-B is difficult due to  
265 active management by beekeepers, maximum reported prevalences that may be indicative of its

266 true 'unmanaged'  $R_0$  are high, for example 73% in Natsopoulou et al. (2017) and 80% in Budge et al.  
267 (2015). These high prevalences are consistent with high  $R_0$  values (Fig. 3c & S.I. (Section 3)).

268 We additionally explored the behaviour of a more specific model, using an age-structured approach  
269 to infection dynamics, where only larvae are vulnerable to infection and develop into infectious  
270 adults with a high pathogen-associated mortality (as might be appropriate for pathogens such as the  
271 acute paralysis virus complex (Martin, 2001)), presented in the S.I. (Section 3). Convergence to  
272 equilibrium happens more slowly than the main model presented here, but still occurs quickly  
273 (within a single beekeeping season; see S.I. 3 Fig. S6). However adult-bee infection prevalence is far  
274 lower than seen in our SI model (S.I. Fig. S6) – this is in agreement with observations of lower  
275 prevalence of paralysis viruses (Budge et al., 2015). Notably, the endemic equilibrium prevalence  
276 increases only by small magnitudes as movement between colonies or apiary sizes are drastically  
277 increased (S.I. Fig. S6), in agreement with our main general result. This equivalence in behaviour  
278 between different models reflecting large disparities in infection mechanics, with empirically-  
279 supported different endemic prevalences, provides evidence that these results are likely  
280 generalisable to many honeybee pathogens.

281 We find rapid spread of a given pathogen across an apiary, which quickly reaches endemic  
282 equilibrium (S.I. Figs. S4 & S5). While pathogens with a higher  $R_0$  reach this equilibrium more quickly,  
283 there is universally rapid spread. Given this result, we focussed throughout this manuscript on the  
284 disease prevalence experienced at endemic equilibrium. This is important for our assumption that  
285 pathogen transmission (driven by movement of bees between colonies) only occurs between  
286 nearest neighbours. This assumption is conservative as rates of pathogen spread would be faster by  
287 virtue of not being limited to nearest-neighbour transmission. However, as we already observe rapid  
288 pathogen spread across apiaries, the effect of this conservative assumption should be negligible. The  
289 rate at which epidemics are established in our model is also in agreement with other honeybee  
290 pathogen models. For example, Jatulan, Rabajante, Banaay, Fajardo, & Jose (2015) show a single

291 infectious adult causes an American Foulbrood (*Paenibacillus larvae*) epidemic that peaks within 50  
292 days. Whilst they do not explicitly find an  $R_0$  for *P. larvae*, the short timescales characterising their  
293 epidemics are in line with ours (S.I. Section 3), suggesting high  $R_0$  values and that their model would  
294 behave similarly to ours at an apiary scale.

295 Changes in rates of bees moving between colonies emerged as a determining component of  
296 apicultural intensification (Fig. 4). One cause of this movement is honeybee drift (Jay, 1965) which  
297 can be managed through changes in the number of colonies and apiary configuration (Jay, 1966,  
298 1968). Links between drift-mediated pathogen transmission and colony numbers have been  
299 documented for a variety of pathogens (Seeley & Smith, 2015) – including brood specialised and  
300 non-specialised, micro- and macro- parasites (Belloy et al., 2007; Budge et al., 2010; Dynes et al.,  
301 2017; Nolan & Delaplane, 2017). Larger numbers of colonies per apiary are a driver of higher drift  
302 (Currie & Jay, 1991), as are changes in apiary arrangement (Jay, 1966). This is why we focus on a  
303 ‘combined’ interpretation of intensification in this study (illustrated in Fig. 2), supported by our  
304 observation that changes in colonies per apiary and apiary size matter most when movement  
305 between colonies is high (Fig. 4; S.I. Fig. S4).

306 Our results contradict some empirical findings that larger apiaries are at higher risk of notably  
307 greater disease prevalences (Mötus et al., 2016). However, our models do not account for  
308 landscape-scale movement of pathogens between apiaries. This is a phenomenon which has been  
309 well documented (Lindström, Korpela, & Fries, 2008; Nolan & Delaplane, 2017). Given our results,  
310 and empirical studies that did not find an association between colonies per apiary and disease risk  
311 (Giacobino et al., 2014), we argue that increasing the number of colonies in an apiary does not  
312 meaningfully alter within-apiary ecology to cause of increased disease prevalence. Larger apiaries  
313 may instead be more likely to import pathogens from other apiaries. Additionally, overstocking of  
314 colonies may lead to resource limitation and consequently impaired immune function (Al-Ghamdi,  
315 Adgaba, Getachew, & Tadesse, 2016; Pasquale et al., 2013). These effects are important for a



316 broader understanding of honeybee epidemiology, but should be separated from the within-apiary  
317 processes studied here. Additionally, most honeybee infectious diseases are caused by multi-host  
318 pathogens shared with other wild bees (Fürst et al., 2014; Manley et al., 2015; McMahon et al.,  
319 2015, 2018). Honeybee colony density across a landscape therefore has implications for wild  
320 pollinator health (Cohen et al., 2017; Graystock et al., 2016), however our results suggest that  
321 increased stocking of honeybees may have smaller impacts on local pollinator infectious disease  
322 dynamics than may have been previously thought.

323 Two clear candidates for future development of this model include seasonality and demography,  
324 which are closely linked. Honeybee demography within a colony influences epidemiology (Betti,  
325 Wahl, & Zamir, 2016) due in part to the temporal polyethism of task allocation influencing exposure  
326 and immunity (Calderone & Page, 1996), as well as the flexible ability of honeybees to regain  
327 immune function when they revert roles (Amdam et al., 2005; Robinson, Page, Strambi, & Strambi,  
328 1992)). However, patterns in how age and immunosenescence in honeybees relates to survival and  
329 infectiousness remain complicated (Roberts & Hughes, 2014). Analytically tractable models  
330 accounting for the role of this complex demography in understanding stress in a colony have only  
331 recently been developed (Booton, Iwasa, Marshall, & Childs, 2017), and extending these models to  
332 incorporate diseases at the apiary scale is challenging. However, notable phenomena worth pursuing  
333 include the role of male bees, which are known to be more easily infected, more infectious, and  
334 more likely to drift between colonies (Currie & Jay, 1991; Roberts & Hughes, 2015), as well as the  
335 role of robbing – where honeybees invade other colonies to steal food (Fries & Camazine, 2001).

336 Other industrialised agricultural livestock systems reflect extreme host densities similar to those in  
337 this study. However, the  $R_0$  for honeybee diseases may exceed that of other livestock diseases. We  
338 compare our lower threshold estimate for the  $R_0$  of *N. ceranae* to all available  $R_0$  values for livestock  
339 diseases that we could readily find in the literature (Fig. S8, see S.I. Section 4). Notably, all other  
340 livestock diseases for which  $R_0$  estimates exist show minimum  $R_0$  values far below our honeybee

341 estimate, however examples of agricultural  $R_0$  values as high or higher than those we present for  
342 honeybees do also exist. There is therefore a clear need to develop explicit models of agricultural  
343 intensification scenarios for important agricultural disease.

344 Overall, our findings represent the first stage in developing robust epidemiological models for  
345 studying honeybee pathogens at an apiary scale. In the face of increasing challenges to global  
346 apiculture, our models predict that the size of apiaries *per se* is not causing notable increases in  
347 disease prevalence for important bee pathogens. Finally, this study demonstrates that conventional  
348 thought on how agricultural intensification influences disease may not be robust in the face of the

349

#### 350 **Acknowledgements**

351 LJB acknowledges funding from a Natural Environment Research Council training grant (NE/L002434/1). CR,  
352 MB, and AW acknowledge funding from a Biotechnology and Biological Sciences Research Council grant  
353 (BB/L010879/1). BJB, JCdR and KSD acknowledge funding from National Institutes of Health (R01-109501); the  
354 content of this study is solely the responsibility of the authors and does not necessarily represent the official  
355 views of the National Institutes of Health.

#### 356 **Authorship**

357 All authors contributed to conceptualisation and scope definition of the study. LJB, CR, MB developed  
358 approach. Mathematical modelling was undertaken by CR, AW, and MB. Computational modelling by LJB, KD,  
359 and MB. Model scope and parameterisation by LJB, KD, JCdR, BJB, LW. LJB and CR created figures, interpreted  
360 results and drafted manuscript with guidance and input from all authors. All authors contributed to further  
361 drafting, revision, and finalisation.

362

## 363 References

- 364 Al-Ghamdi, A., Adgaba, N., Getachew, A., & Tadesse, Y. (2016). New approach for determination of  
365 an optimum honeybee colony's carrying capacity based on productivity and nectar secretion  
366 potential of bee forage species. *Saudi Journal of Biological Sciences*, 23(1), 92–100.  
367 doi:10.1016/j.sjbs.2014.09.020
- 368 Amdam, G. V., Aase, A. L. T. O., Seehuus, S.-C., Kim Fondrk, M., Norberg, K., & Hartfelder, K. (2005).  
369 Social reversal of immunosenescence in honey bee workers. *Experimental Gerontology*,  
370 40(12), 939–947. doi:10.1016/j.exger.2005.08.004
- 371 Anderson, R. M., May, R. M., & Anderson, B. (1992). *Infectious diseases of humans: dynamics and*  
372 *control* (Vol. 28). Wiley Online Library.
- 373 Atkins, K. E., Read, A. F., Savill, N. J., Renz, K. G., Islam, A. F., Walkden-Brown, S. W., & Woolhouse,  
374 M. E. J. (2013). Vaccination and Reduced Cohort Duration Can Drive Virulence Evolution:  
375 Marek's Disease Virus and Industrialized Agriculture. *Evolution*, 67(3), 851–860.  
376 doi:10.1111/j.1558-5646.2012.01803.x
- 377 Becher, M. A., Osborne, J. L., Thorbek, P., Kennedy, P. J., & Grimm, V. (2013). REVIEW: Towards a  
378 systems approach for understanding honeybee decline: a stocktaking and synthesis of  
379 existing models. *Journal of Applied Ecology*, 50(4), 868–880. doi:10.1111/1365-2664.12112
- 380 Belloy, L., Imdorf, A., Fries, I., Forsgren, E., Berthoud, H., Kuhn, R., & Charrière, J.-D. (2007). Spatial  
381 distribution of *Melissococcus plutonius* in adult honey bees collected from apiaries and  
382 colonies with and without symptoms of European foulbrood. *Apidologie*, 38(2), 136–140.
- 383 Betti, M. I., Wahl, L. M., & Zamir, M. (2016). Age structure is critical to the population dynamics and  
384 survival of honeybee colonies. *Royal Society Open Science*, 3(11), 160444.  
385 doi:10.1098/rsos.160444
- 386 Betti, Matt I., Wahl, L. M., & Zamir, M. (2014). Effects of Infection on Honey Bee Population  
387 Dynamics: A Model. *PLOS ONE*, 9(10), e110237. doi:10.1371/journal.pone.0110237

- 388 Booton, R. D., Iwasa, Y., Marshall, J. A. R., & Childs, D. Z. (2017). Stress-mediated Allee effects can  
389 cause the sudden collapse of honey bee colonies. *Journal of Theoretical Biology*, *420*, 213–  
390 219. doi:10.1016/j.jtbi.2017.03.009
- 391 Brijnath, B., Butler, C. D., & McMichael, A. J. (2014). In an interconnected world: joint research  
392 priorities for the environment, agriculture and infectious disease. *Infectious Diseases of*  
393 *Poverty*, *3*, 2. doi:10.1186/2049-9957-3-2
- 394 Brosi, B. J., Delaplane, K. S., Boots, M., & Roode, J. C. de. (2017). Ecological and evolutionary  
395 approaches to managing honeybee disease. *Nature Ecology & Evolution*, *1*(9), 1250.  
396 doi:10.1038/s41559-017-0246-z
- 397 Budge, G. E., Barrett, B., Jones, B., Pietravalle, S., Marris, G., Chantawannakul, P., ... Brown, M. A.  
398 (2010). The occurrence of *Melissococcus plutonius* in healthy colonies of *Apis mellifera* and  
399 the efficacy of European foulbrood control measures. *Journal of Invertebrate Pathology*,  
400 *105*(2), 164–170. doi:10.1016/j.jip.2010.06.004
- 401 Budge, G. E., Pietravalle, S., Brown, M., Laurenson, L., Jones, B., Tomkies, V., & Delaplane, K. S.  
402 (2015). Pathogens as Predictors of Honey Bee Colony Strength in England and Wales. *PLOS*  
403 *ONE*, *10*(7), e0133228. doi:10.1371/journal.pone.0133228
- 404 Calderone, N. W., & Page, R. E. (1996). Temporal polyethism and behavioural canalization in the  
405 honey bee, *Apis mellifera*. *Animal Behaviour*, *51*(3), 631–643. doi:10.1006/anbe.1996.0068
- 406 Cohen, H., Quistberg, R. D., Philpott, S. M., & DeGrandi-Hoffman, G. (2017). Vegetation Management  
407 and Host Density Influence Bee–Parasite Interactions in Urban Gardens. *Environmental*  
408 *Entomology*. doi:10.1093/ee/nvx155
- 409 Cressler, C. E., McLeod, D. V., Rozins, C., Hoogen, J. V. D., & Day, T. (2016). The adaptive evolution of  
410 virulence: a review of theoretical predictions and empirical tests. *Parasitology*, *143*(7), 915–  
411 930. doi:10.1017/S003118201500092X

- 412 Currie, R. W., & Jay, S. C. (1991). Drifting behaviour of drone honey bees (*Apis mellifera* L.) in  
413 commercial apiaries. *Journal of Apicultural Research*, 30(2), 61–68.  
414 doi:10.1080/00218839.1991.11101235
- 415 De la Rúa, P., Jaffé, R., Dall’Olio, R., Muñoz, I., & Serrano, J. (2009). Biodiversity, conservation and  
416 current threats to European honeybees. *Apidologie*, 40(3), 263–284.  
417 doi:10.1051/apido/2009027
- 418 Dynes, T. L., Roode, J. C. D., Lyons, J. I., Berry, J. A., Delaplane, K. S., & Brosi, B. J. (2017). Fine scale  
419 population genetic structure of *Varroa destructor*, an ectoparasitic mite of the honey bee  
420 (*Apis mellifera*). *Apidologie*, 48(1), 93–101. doi:10.1007/s13592-016-0453-7
- 421 Fantham, H. B., & Porter, A. (1912). The Morphology and Life History of *Nosema Apis* and the  
422 Significance of its Various Stages in the so-called ‘Isle of Wight’ Disease in Bees  
423 (Microsporidiosis). *Annals of Tropical Medicine & Parasitology*, 6(2), 163–195.  
424 doi:10.1080/00034983.1912.11687060
- 425 Free, J. B. (1958). The drifting of honey-bees. *The Journal of Agricultural Science*, 51(3), 294–306.  
426 doi:10.1017/S0021859600035103
- 427 Fries, I., & Camazine, S. (2001). Implications of horizontal and vertical pathogen transmission for  
428 honey bee epidemiology. *Apidologie*, 32(3), 199–214. doi:10.1051/apido:2001122
- 429 Fürst, M. A., McMahon, D. P., Osborne, J. L., Paxton, R. J., & Brown, M. J. F. (2014). Disease  
430 associations between honeybees and bumblebees as a threat to wild pollinators. *Nature*,  
431 506(7488), 364. doi:10.1038/nature12977
- 432 Gandon, S., Hochberg, M. E., Holt, R. D., & Day, T. (2013). What limits the evolutionary emergence of  
433 pathogens? *Philosophical Transactions of the Royal Society of London B: Biological Sciences*,  
434 368(1610), 20120086. doi:10.1098/rstb.2012.0086
- 435 Ghazoul, J. (2005). Buzziness as usual? Questioning the global pollination crisis. *Trends in Ecology &*  
436 *Evolution*, 20(7), 367–373. doi:10.1016/j.tree.2005.04.026

- 437 Giacobino, A., Cagnolo, N. B., Merke, J., Orellano, E., Bertozzi, E., Masciangelo, G., ... Signorini, M.  
438 (2014). Risk factors associated with the presence of *Varroa destructor* in honey bee colonies  
439 from east-central Argentina. *Preventive Veterinary Medicine*, 115(3–4), 280–287.  
440 doi:10.1016/j.prevetmed.2014.04.002
- 441 Goodwin, R. M., Perry, J. H., & Houten, A. T. (1994). The effect of drifting honey bees on the spread  
442 of American foulbrood infections. *Journal of Apicultural Research*, 33(4), 209–212.  
443 doi:10.1080/00218839.1994.11100873
- 444 Graystock, P., Blane, E. J., McFrederick, Q. S., Goulson, D., & Hughes, W. O. H. (2016). Do managed  
445 bees drive parasite spread and emergence in wild bees? *International Journal for*  
446 *Parasitology: Parasites and Wildlife*, 5(1), 64–75. doi:10.1016/j.ijppaw.2015.10.001
- 447 Higes, M., Martín-Hernández, R., Botías, C., Bailón, E. G., González-Porto, A. V., Barrios, L., ... Meana,  
448 A. (2008). How natural infection by *Nosema ceranae* causes honeybee colony collapse.  
449 *Environmental Microbiology*, 10(10), 2659–2669. doi:10.1111/j.1462-2920.2008.01687.x
- 450 Higes, M., Martín-Hernández, R., Garrido-Bailón, E., González-Porto, A. V., García-Palencia, P.,  
451 Meana, A., ... Bernal, J. L. (2009). Honeybee colony collapse due to *Nosema ceranae* in  
452 professional apiaries. *Environmental Microbiology Reports*, 1(2), 110–113.  
453 doi:10.1111/j.1758-2229.2009.00014.x
- 454 Jacques, A., Laurent, M., Consortium, E., Ribière-Chabert, M., Saussac, M., Bougeard, S., ... Chauzat,  
455 M.-P. (2017). A pan-European epidemiological study reveals honey bee colony survival  
456 depends on beekeeper education and disease control. *PLOS ONE*, 12(3), e0172591.  
457 doi:10.1371/journal.pone.0172591
- 458 James, C. (1981). The cost of disease to world agriculture. *Seed Science and Technology*  
459 *(Netherlands)*. Retrieved from [http://agris.fao.org/agris-](http://agris.fao.org/agris-search/search.do?recordID=XE8280339)  
460 [search/search.do?recordID=XE8280339](http://agris.fao.org/agris-search/search.do?recordID=XE8280339)

- 461 Jatulan, E. O., Rabajante, J. F., Banaay, C. G. B., Fajardo, A. C., & Jose, E. C. (2015). A Mathematical  
462 Model of Intra-Colony Spread of American Foulbrood in European Honeybees (*Apis mellifera*  
463 L.). *PLOS ONE*, *10*(12), e0143805. doi:10.1371/journal.pone.0143805
- 464 Jay, S. C. (1965). Drifting of Honeybees in Commercial Apiaries 1. Effect of Various Environmental  
465 Factors. *Journal of Apicultural Research*, *4*(3), 167–175.  
466 doi:10.1080/00218839.1965.11100119
- 467 Jay, S. C. (1966). Drifting of Honeybees in Commercial Apiaries. III. Effect of Apiary Layout. *Journal of*  
468 *Apicultural Research*, *5*(3), 137–148. doi:10.1080/00218839.1966.11100147
- 469 Jay, S. C. (1968). Drifting of Honeybees in Commercial Apiaries. IV. Further Studies of the Effect of  
470 Apiary Layout. *Journal of Apicultural Research*, *7*(1), 37–44.  
471 doi:10.1080/00218839.1968.11100185
- 472 Jones, B. A., Grace, D., Kock, R., Alonso, S., Rushton, J., Said, M. Y., ... Pfeiffer, D. U. (2013). Zoonosis  
473 emergence linked to agricultural intensification and environmental change. *Proceedings of*  
474 *the National Academy of Sciences*, *110*(21), 8399–8404. doi:10.1073/pnas.1208059110
- 475 Keeling, M. J., & Rohani, P. (2008). *Modeling Infectious Diseases in Humans and Animals*. Princeton  
476 University Press.
- 477 Kennedy, D. A., Kurath, G., Brito, I. L., Purcell, M. K., Read, A. F., Winton, J. R., & Wargo, A. R. (2016).  
478 Potential drivers of virulence evolution in aquaculture. *Evolutionary Applications*, *9*(2), 344–  
479 354. doi:10.1111/eva.12342
- 480 Kielmanowicz, M. G., Inberg, A., Lerner, I. M., Golani, Y., Brown, N., Turner, C. L., ... Ballam, J. M.  
481 (2015). Prospective Large-Scale Field Study Generates Predictive Model Identifying Major  
482 Contributors to Colony Losses. *PLOS Pathogens*, *11*(4), e1004816.  
483 doi:10.1371/journal.ppat.1004816
- 484 Lindström, A., Korpela, S., & Fries, I. (2008). Horizontal transmission of *Paenibacillus* larvae spores  
485 between honey bee (*Apis mellifera*) colonies through robbing. *Apidologie*, *39*(5), 515–522.  
486 doi:10.1051/apido:2008032

- 487 Manley, R., Boots, M., & Wilfert, L. (2015). REVIEW: Emerging viral disease risk to pollinating insects:  
488 ecological, evolutionary and anthropogenic factors. *Journal of Applied Ecology*, 52(2), 331–  
489 340. doi:10.1111/1365-2664.12385
- 490 Martin, S. J. (2001). The role of Varroa and viral pathogens in the collapse of honeybee colonies: a  
491 modelling approach. *Journal of Applied Ecology*, 38(5), 1082–1093. doi:10.1046/j.1365-  
492 2664.2001.00662.x
- 493 Martín-Hernández, R., Botías, C., Barrios, L., Martínez-Salvador, A., Meana, A., Mayack, C., & Higes,  
494 M. (2011). Comparison of the energetic stress associated with experimental Nosema  
495 ceranae and Nosema apis infection of honeybees (*Apis mellifera*). *Parasitology Research*,  
496 109(3), 605–612. doi:10.1007/s00436-011-2292-9
- 497 McMahon, D. P., Fürst, M. A., Caspar, J., Theodorou, P., Brown, M. J. F., & Paxton, R. J. (2015). A sting  
498 in the spit: widespread cross-infection of multiple RNA viruses across wild and managed  
499 bees. *Journal of Animal Ecology*, 84(3), 615–624. doi:10.1111/1365-2656.12345
- 500 McMahon, D. P., Natsopoulou, M. E., Doublet, V., Fürst, M., Weging, S., Brown, M. J. F., ... Paxton, R.  
501 J. (2016). Elevated virulence of an emerging viral genotype as a driver of honeybee loss.  
502 *Proc. R. Soc. B*, 283(1833), 20160811. doi:10.1098/rspb.2016.0811
- 503 McMahon, D. P., Wilfert, L., Paxton, R. J., & Brown, M. J. F. (2018). Emerging Viruses in Bees: From  
504 Molecules to Ecology. In *Advances in Virus Research*. Academic Press.  
505 doi:10.1016/bs.avir.2018.02.008
- 506 Mennerat, A., Nilsen, F., Ebert, D., & Skorping, A. (2010). Intensive Farming: Evolutionary  
507 Implications for Parasites and Pathogens. *Evolutionary Biology*, 37(2–3), 59–67.  
508 doi:10.1007/s11692-010-9089-0
- 509 Mötus, K., Raie, A., Orro, T., Chauzat, M.-P., & Viltrop, A. (2016). Epidemiology, risk factors and  
510 varroa mite control in the Estonian honey bee population. *Journal of Apicultural Research*,  
511 55(5), 396–412. doi:10.1080/00218839.2016.1251081



- 512 Natsopoulou, M. E., McMahon, D. P., Doublet, V., Frey, E., Rosenkranz, P., & Paxton, R. J. (2017). The  
513 virulent, emerging genotype B of Deformed wing virus is closely linked to overwinter  
514 honeybee worker loss. *Scientific Reports*, 7(1), 5242. doi:10.1038/s41598-017-05596-3
- 515 Neumann, P., Radloff, S. E., Pirk, C. W. W., & Hepburn, R. (2003). The behaviour of drifted Cape  
516 honeybee workers (*Apis mellifera capensis*): predisposition for social parasitism? *Apidologie*,  
517 34(6), 585–590. doi:10.1051/apido:2003048
- 518 Nolan, M. P., & Delaplane, K. S. (2017). Distance between honey bee *Apis mellifera* colonies  
519 regulates populations of *Varroa destructor* at a landscape scale. *Apidologie*, 48(1), 8–16.  
520 doi:10.1007/s13592-016-0443-9
- 521 Pacini, A., Giacobino, A., Molineri, A., Bulacio Cagnolo, N., Aignasse, A., Zago, L., ... Signorini, M.  
522 (2016). Risk factors associated with the abundance of *Nosema* spp. in apiaries located in  
523 temperate and subtropical conditions after honey harvest. *Journal of Apicultural Research*,  
524 55(4), 342–350. doi:10.1080/00218839.2016.1245396
- 525 Pasquale, G. D., Salignon, M., Conte, Y. L., Belzunces, L. P., Decourtye, A., Kretzschmar, A., ... Alaux, C.  
526 (2013). Influence of Pollen Nutrition on Honey Bee Health: Do Pollen Quality and Diversity  
527 Matter? *PLOS ONE*, 8(8), e72016. doi:10.1371/journal.pone.0072016
- 528 Paxton, R. J. (2010). Does infection by *Nosema ceranae* cause “Colony Collapse Disorder” in honey  
529 bees (*Apis mellifera*)? *Journal of Apicultural Research*, 49(1), 80–84.  
530 doi:10.3896/IBRA.1.49.1.11
- 531 Paxton, R. J., Klee, J., Korpela, S., & Fries, I. (2007). *Nosema ceranae* has infected *Apis mellifera* in  
532 Europe since at least 1998 and may be more virulent than *Nosema apis*. *Apidologie*, 38(6),  
533 558–565. doi:10.1051/apido:2007037
- 534 Pocol, C. B., Marghitas, L. A., & Popa, A. A. (2012). Evaluation of sustainability of the beekeeping  
535 sector in the North West Region of Romania. *J Food Agric Environ*, 10, 1132–1138.

- 536 Potts, S. G., Biesmeijer, J. C., Kremen, C., Neumann, P., Schweiger, O., & Kunin, W. E. (2010). Global  
537 pollinator declines: trends, impacts and drivers. *Trends in Ecology & Evolution*, *25*(6), 345–  
538 353. doi:10.1016/j.tree.2010.01.007
- 539 Roberts, K. E., & Hughes, W. O. H. (2015). Horizontal transmission of a parasite is influenced by  
540 infected host phenotype and density. *Parasitology*, *142*(2), 395–405.
- 541 Roberts, Katherine E., & Hughes, W. O. H. (2014). Immunosenescence and resistance to parasite  
542 infection in the honey bee, *Apis mellifera*. *Journal of Invertebrate Pathology*, *121*, 1–6.  
543 doi:10.1016/j.jip.2014.06.004
- 544 Robinson, G. E., Page, R. E., Strambi, C., & Strambi, A. (1992). Colony Integration in Honey Bees:  
545 Mechanisms of Behavioral Reversion. *Ethology*, *90*(4), 336–348. doi:10.1111/j.1439-  
546 0310.1992.tb00844.x
- 547 Roetschi, A., Berthoud, H., Kuhn, R., & Imdorf, A. (2008). Infection rate based on quantitative real-  
548 time PCR of *Melissococcus plutonius*, the causal agent of European foulbrood, in honeybee  
549 colonies before and after apiary sanitation. *Apidologie*, *39*(3), 362–371.  
550 doi:10.1051/apido:200819
- 551 Rozins, C., & Day, T. (2016). Disease eradication on large industrial farms. *Journal of Mathematical*  
552 *Biology*, *73*(4), 885–902. doi:10.1007/s00285-016-0973-9
- 553 Seeley, T. D., & Smith, M. L. (2015). Crowding honeybee colonies in apiaries can increase their  
554 vulnerability to the deadly ectoparasite *Varroa destructor*. *Apidologie*, *46*(6), 716–727.  
555 doi:10.1007/s13592-015-0361-2
- 556 van den Driessche, P., & Watmough, J. (2002). Reproduction numbers and sub-threshold endemic  
557 equilibria for compartmental models of disease transmission. *Mathematical Biosciences*,  
558 *180*(1), 29–48. doi:10.1016/S0025-5564(02)00108-6
- 559 van Engelsdorp, D., Lengerich, E., Spleen, A., Dainat, B., Cresswell, J., Baylis, K., ... Saegerman, C.  
560 (2013). Standard epidemiological methods to understand and improve *Apis mellifera* health.  
561 *Journal of Apicultural Research*, *52*(4), 1–16. doi:10.3896/IBRA.1.52.4.15

- 562 vanEngelsdorp, D., & Meixner, M. D. (2010). A historical review of managed honey bee populations  
563 in Europe and the United States and the factors that may affect them. *Journal of*  
564 *Invertebrate Pathology*, 103, S80–S95. doi:10.1016/j.jip.2009.06.011
- 565 Wilfert, L., Long, G., Leggett, H. C., Schmid-Hempel, P., Butlin, R., Martin, S. J. M., & Boots, M. (2016).  
566 Deformed wing virus is a recent global epidemic in honeybees driven by Varroa mites.  
567 *Science*, 351(6273), 594–597. doi:10.1126/science.aac9976
- 568
